# Supplementary material for: Effect of hydration equilibria on the relaxometric properties of Gd(iii) complexes: new insights into old systems
Source: Royal Society of Chemistry journal article supplement (doi:10.1039/d3dt03413e), 2023-01-01
Supplement: d3dt03413e1.pdf [file d3dt03413e1.pdf]

## Electronic Supporting Information (ESI)

# Effect of Hydration Equilibria on the Relaxometric Properties of Gd(III) Complexes: New Insights into Old Systems

*Alessandro Nucera,<sup>†</sup> Carlos Platas-Iglesias,<sup>§\*</sup> Fabio Carniato,<sup>†</sup> Mauro Botta.<sup>†\*</sup>*

<sup>†</sup> Dipartimento di Scienze e Innovazione Tecnologica, Università del Piemonte Orientale,  
Viale Teresa Michel 11, 15121 Alessandria (Italy). [mauro.botta@uniupo.it](mailto:mauro.botta@uniupo.it)

<sup>§</sup> Departamento de Química Fundamental, Facultade de Ciencias, Universidade da  
Coruña, Campus da Zapateira-Rúa da Fraga 10, 15008 A Coruña, Spain.  
[carlos.platas.iglesias@udc.es](mailto:carlos.platas.iglesias@udc.es)

## Content

|                                                                                                                                                                                                                                                                                                                                                                           |    |
|---------------------------------------------------------------------------------------------------------------------------------------------------------------------------------------------------------------------------------------------------------------------------------------------------------------------------------------------------------------------------|----|
| <b>Figure S1:</b> pH dependency of $r_1$ of $[\text{Gd}(\text{EDTA})(\text{H}_2\text{O})_q]^-$ (30 MHz, 298K). Relaxivity values are constant between pH 4 and 8.5.                                                                                                                                                                                                       | 3  |
| <b>Figure S2:</b> pH dependency of $r_1$ of $[\text{Gd}(\text{CDTA})(\text{H}_2\text{O})_q]^-$ (30 MHz, 298K). Relaxivity values are constant throughout the investigated pH range.                                                                                                                                                                                       | 3  |
| <b>Figure S3:</b> Structure of the $[\text{Gd}(\text{EDTA})(\text{H}_2\text{O})_3]^{3+} \cdot 4\text{H}_2\text{O}$ system obtained with DFT calculations (wB97XD/LCECP/Def2-TZVPP).                                                                                                                                                                                       | 4  |
| <b>Figure S4:</b> Structure of the $[\text{Gd}(\text{EDTA})(\text{H}_2\text{O})_2]^{3+} \cdot 5\text{H}_2\text{O}$ system obtained with DFT calculations (wB97XD/LCECP/Def2-TZVPP).                                                                                                                                                                                       | 5  |
| <b>Figure S5:</b> Structure of the $[\text{Gd}(\text{CDTA})(\text{H}_2\text{O})_3]^{3+} \cdot 4\text{H}_2\text{O}$ system obtained with DFT calculations (wB97XD/LCECP/Def2-TZVPP).                                                                                                                                                                                       | 6  |
| <b>Figure S5:</b> Structure of the $[\text{Gd}(\text{CDTA})(\text{H}_2\text{O})_2]^{3+} \cdot 5\text{H}_2\text{O}$ system obtained with DFT calculations (wB97XD/LCECP/Def2-TZVPP).                                                                                                                                                                                       | 7  |
| <b>Table S1:</b> Cartesian coordinates obtained with DFT calculations for the $[\text{Gd}(\text{H}_2\text{O})_8]^{3+} \cdot 19\text{H}_2\text{O}$ system (wB97XD/LCECP/Def2-TZVPP, 0 imaginary frequencies). <sup>a</sup>                                                                                                                                                 | 7  |
| <b>Table S2:</b> Cartesian coordinates obtained with DFT calculations for the $[\text{Gd}(\text{H}_2\text{O})_9]^{3+} \cdot 18\text{H}_2\text{O}$ system (wB97XD/LCECP/Def2-TZVPP, 0 imaginary frequencies). <sup>a</sup>                                                                                                                                                 | 9  |
| <b>Table S3:</b> Cartesian coordinates obtained with DFT calculations for the transition state responsible for the $[\text{Gd}(\text{H}_2\text{O})_9]^{3+} \cdot 18\text{H}_2\text{O} \leftrightarrow [\text{Gd}(\text{H}_2\text{O})_8]^{3+} \cdot 19\text{H}_2\text{O}$ interconversion (wB97XD/LCECP/Def2-TZVPP, 1 imaginary frequency). <sup>a</sup>                   | 11 |
| <b>Table S4:</b> Cartesian coordinates obtained with DFT calculations for the $[\text{Gd}(\text{EDTA})(\text{H}_2\text{O})_3]^- \cdot 4\text{H}_2\text{O}$ system (wB97XD/LCECP/Def2-TZVPP, 0 imaginary frequencies). <sup>a</sup>                                                                                                                                        | 12 |
| <b>Table S5:</b> Cartesian coordinates obtained with DFT calculations for the $[\text{Gd}(\text{EDTA})(\text{H}_2\text{O})_2]^- \cdot 5\text{H}_2\text{O}$ system (wB97XD/LCECP/Def2-TZVPP, 0 imaginary frequencies). <sup>a</sup>                                                                                                                                        | 13 |
| <b>Table S6:</b> Cartesian coordinates obtained with DFT calculations for the transition state responsible for the $[\text{Gd}(\text{EDTA})(\text{H}_2\text{O})_2]^- \cdot 5\text{H}_2\text{O} \leftrightarrow [\text{Gd}(\text{EDTA})(\text{H}_2\text{O})_3]^- \cdot 4\text{H}_2\text{O}$ interconversion (wB97XD/LCECP/Def2-TZVPP, 1 imaginary frequency). <sup>a</sup> | 14 |
| <b>Table S7:</b> Cartesian coordinates obtained with DFT calculations for the $[\text{Gd}(\text{CDTA})(\text{H}_2\text{O})_3]^- \cdot 4\text{H}_2\text{O}$ system (wB97XD/LCECP/Def2-TZVPP, 0 imaginary frequencies). <sup>a</sup>                                                                                                                                        | 16 |
| <b>Table S8:</b> Cartesian coordinates obtained with DFT calculations for the $[\text{Gd}(\text{CDTA})(\text{H}_2\text{O})_2]^- \cdot 5\text{H}_2\text{O}$ system (wB97XD/LCECP/Def2-TZVPP, 0 imaginary frequencies). <sup>a</sup>                                                                                                                                        | 17 |
| <b>Sample Gaussian input file:</b>                                                                                                                                                                                                                                                                                                                                        | 18 |
| <b>Sample ORCA input file (DFT):</b>                                                                                                                                                                                                                                                                                                                                      | 21 |
| <b>Sample ORCA input file (NEVPT2):</b>                                                                                                                                                                                                                                                                                                                                   | 24 |

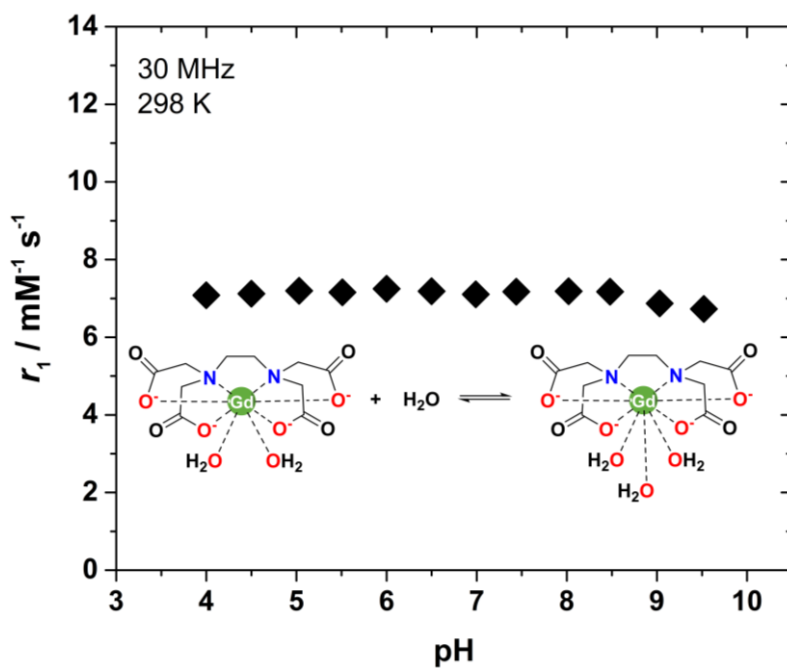

**Figure S1:** pH dependency of  $r_1$  of  $[\text{Gd}(\text{EDTA})(\text{H}_2\text{O})_q]^-$  (30 MHz, 298K). Relaxivity values are constant between pH 4 and 8.5.

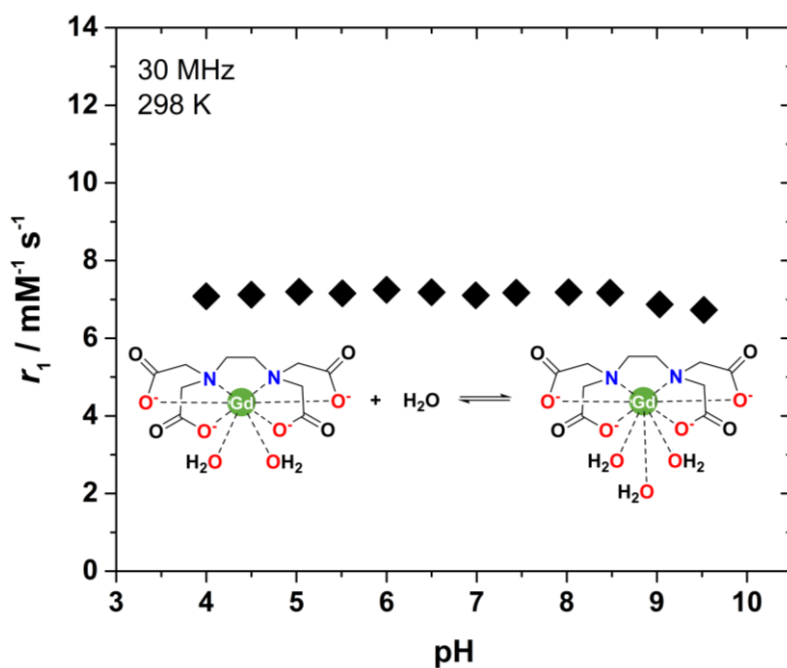

**Figure S2:** pH dependency of  $r_1$  of  $[\text{Gd}(\text{CDTA})(\text{H}_2\text{O})_q]^-$  (30 MHz, 298K). Relaxivity values are constant throughout the investigated pH range.

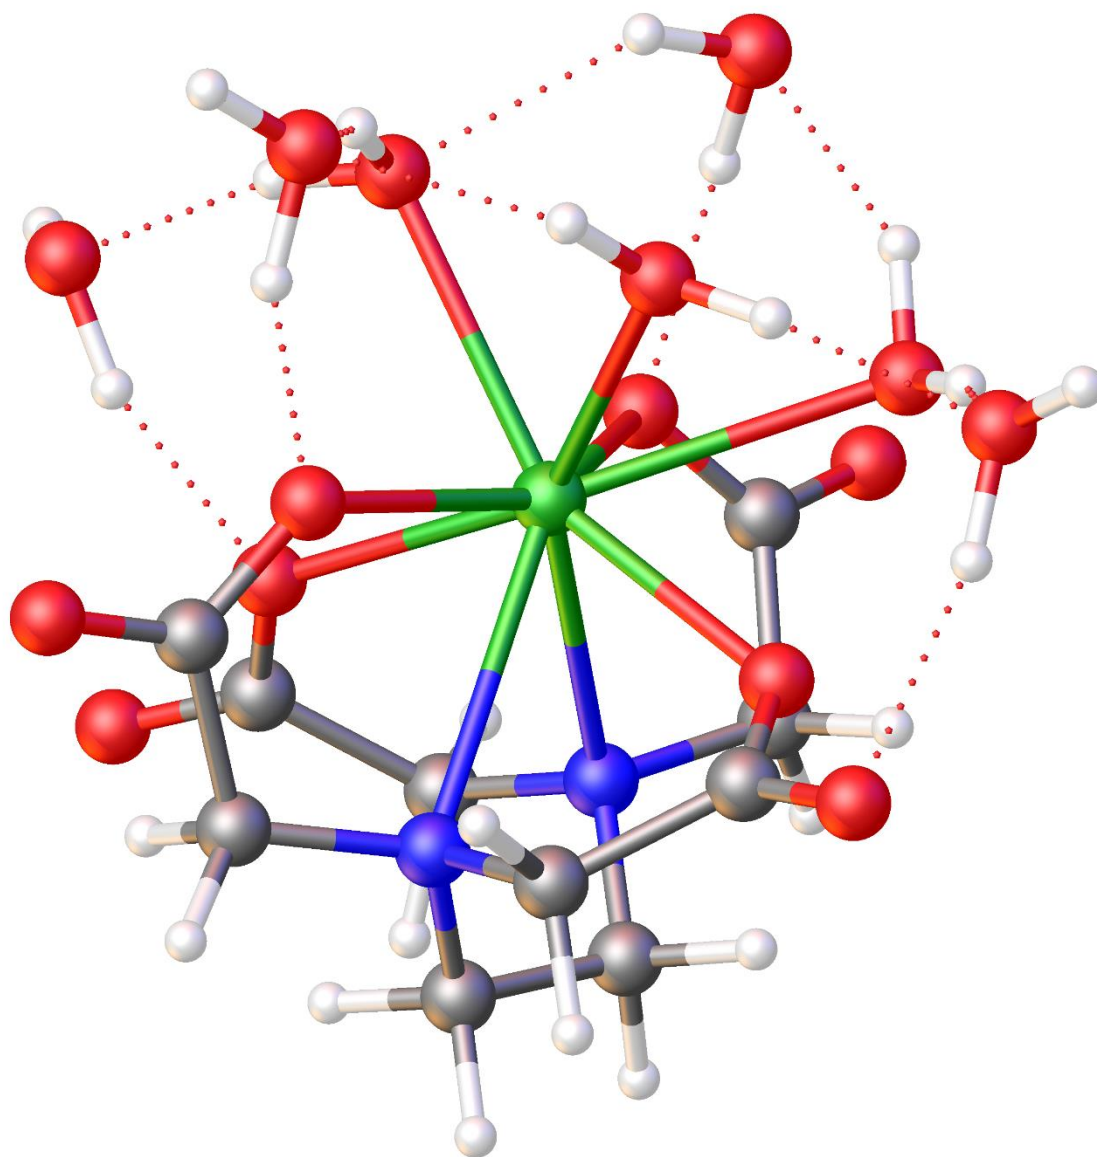

**Figure S3:** Structure of the  $[\text{Gd}(\text{EDTA})(\text{H}_2\text{O})_3]^{3+} \cdot 4\text{H}_2\text{O}$  system obtained with DFT calculations (wB97XD/LCECP/Def2-TZVPP).

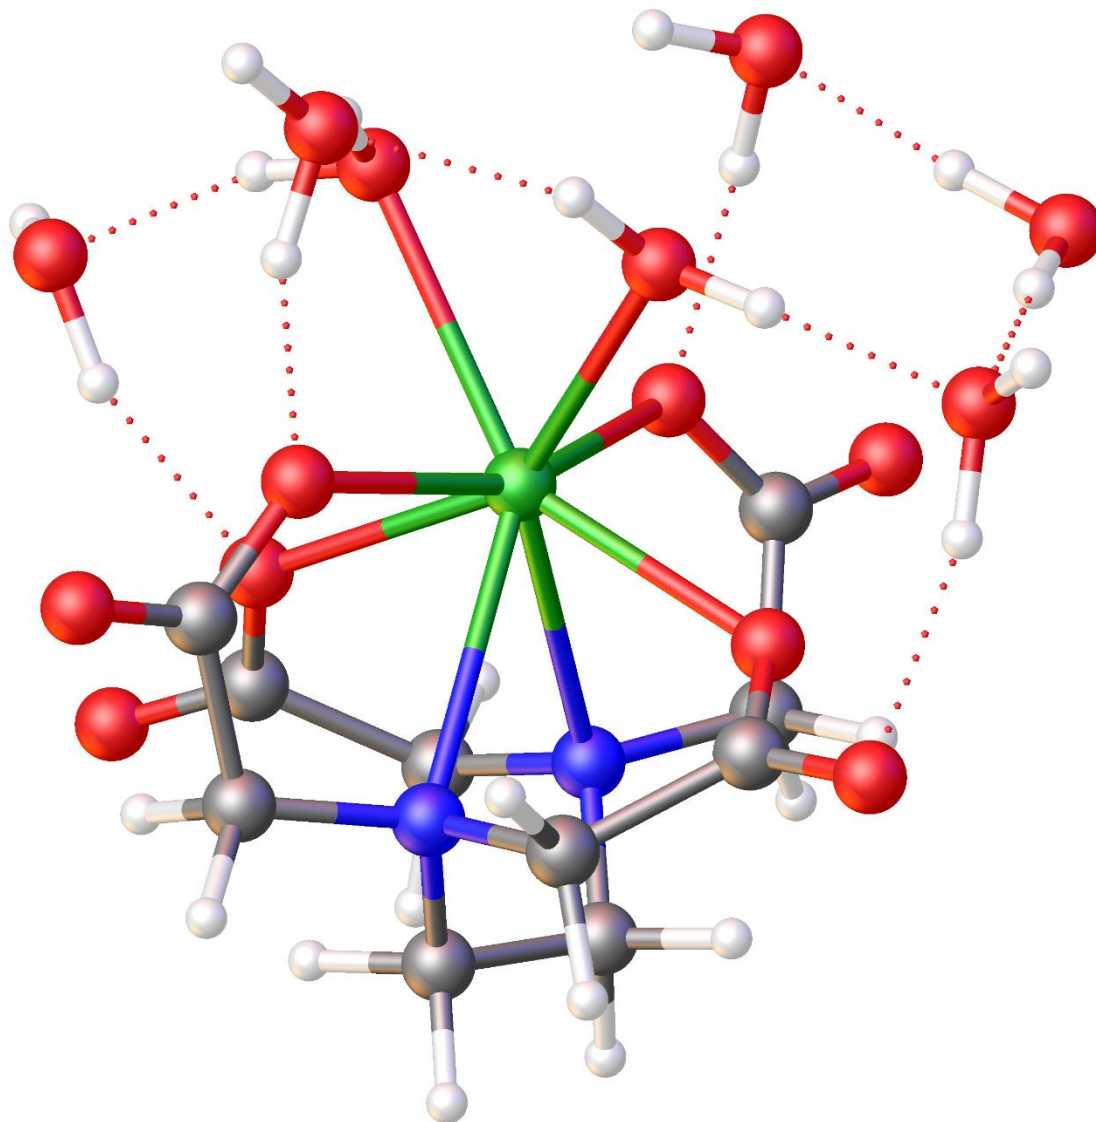

**Figure S4:** Structure of the  $[\text{Gd}(\text{EDTA})(\text{H}_2\text{O})_2]^{3+} \cdot 5\text{H}_2\text{O}$  system obtained with DFT calculations (wB97XD/LCECP/Def2-TZVPP).

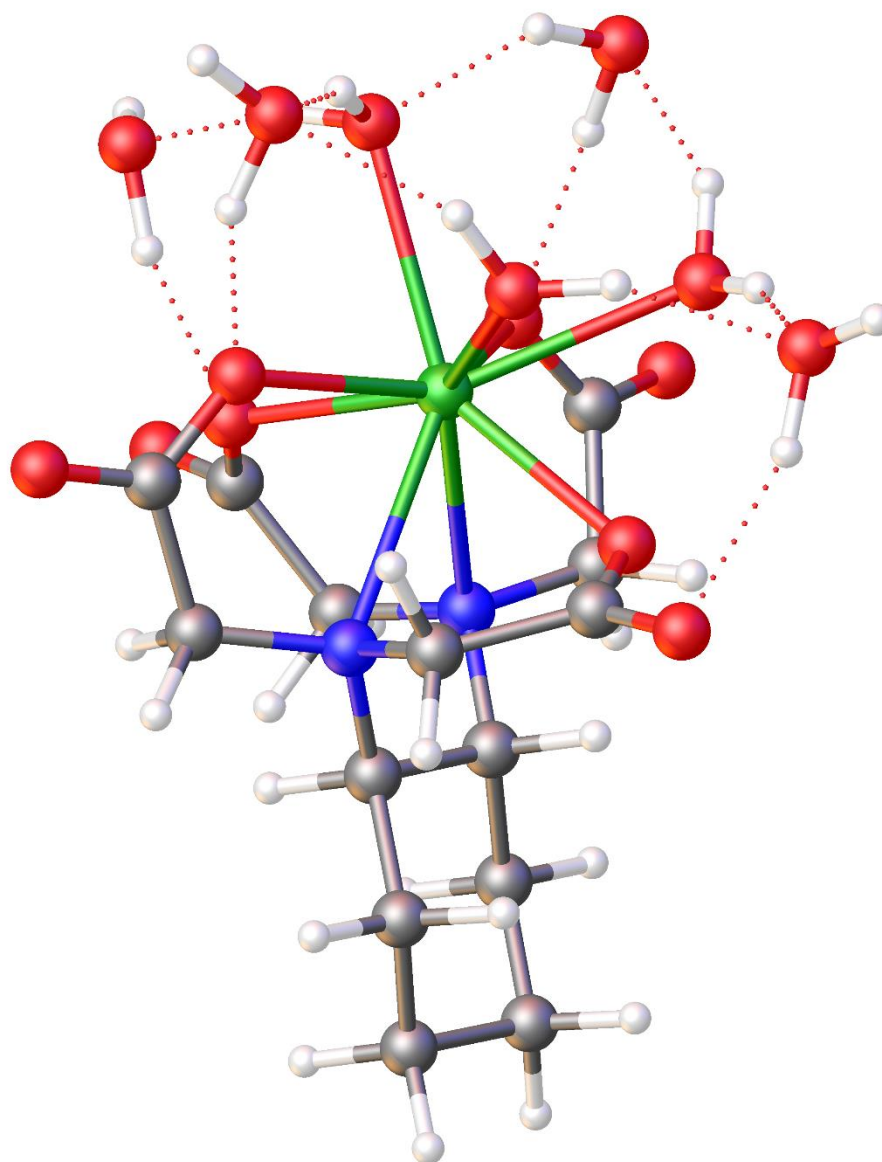

**Figure S5:** Structure of the  $[\text{Gd}(\text{CDTA})(\text{H}_2\text{O})_3]^{3+} \cdot 4\text{H}_2\text{O}$  system obtained with DFT calculations (wB97XD/LCECP/Def2-TZVPP).

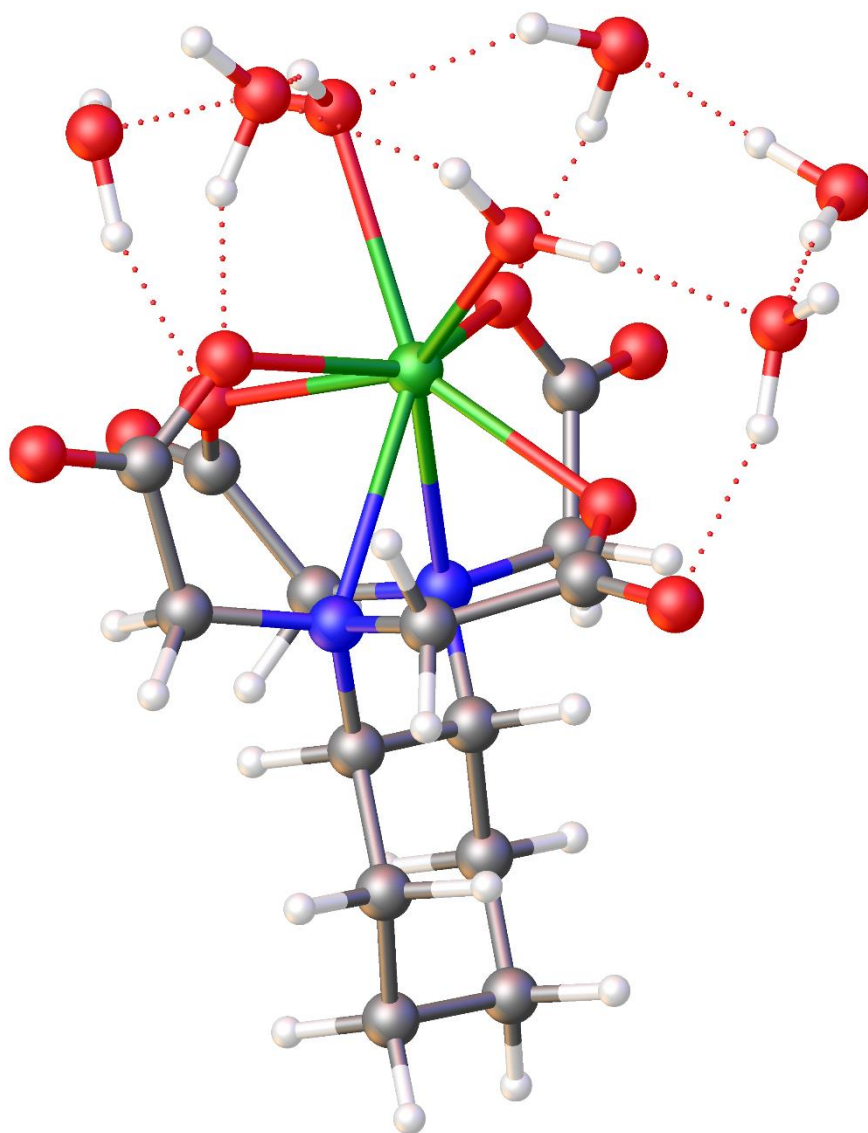

**Figure S5:** Structure of the  $[\text{Gd}(\text{CDTA})(\text{H}_2\text{O})_2]^{3+} \cdot 5\text{H}_2\text{O}$  system obtained with DFT calculations (wB97XD/LCECP/Def2-TZVPP).

**Table S1:** Cartesian coordinates obtained with DFT calculations for the  $[\text{Gd}(\text{H}_2\text{O})_8]^{3+} \cdot 19\text{H}_2\text{O}$  system (wB97XD/LCECP/Def2-TZVPP, 0 imaginary frequencies).<sup>a</sup>

| Center Number | Atomic Number |   | Coordinates (Å) |           |           |
|---------------|---------------|---|-----------------|-----------|-----------|
|               |               |   | X               | Y         | Z         |
| 1             | 64            | 0 | -0.027286       | 0.222621  | 0.496264  |
| 2             | 8             | 0 | 2.002585        | -0.053248 | 1.816816  |
| 3             | 1             | 0 | 2.019011        | -0.059397 | 2.789102  |
| 4             | 1             | 0 | 2.763205        | -0.578429 | 1.487191  |
| 5             | 8             | 0 | -0.058028       | 2.032645  | 2.144948  |
| 6             | 1             | 0 | 0.718526        | 2.383539  | 2.617328  |
| 7             | 1             | 0 | -0.835231       | 2.233941  | 2.692730  |
| 8             | 8             | 0 | 1.452116        | -1.063043 | -0.901019 |
| 9             | 1             | 0 | 1.460965        | -1.996155 | -1.177519 |

|    |   |   |           |           |           |
|----|---|---|-----------|-----------|-----------|
| 10 | 1 | 0 | 2.287829  | -0.664365 | -1.221971 |
| 11 | 8 | 0 | -0.135659 | -2.064693 | 1.579356  |
| 12 | 1 | 0 | 0.641832  | -2.652653 | 1.485128  |
| 13 | 1 | 0 | -0.930630 | -2.586679 | 1.356110  |
| 14 | 8 | 0 | 1.615156  | 1.807495  | -0.338643 |
| 15 | 1 | 0 | 1.667706  | 2.293493  | -1.181177 |
| 16 | 1 | 0 | 2.346445  | 2.121327  | 0.238243  |
| 17 | 8 | 0 | -0.641893 | 0.466499  | -3.657043 |
| 18 | 1 | 0 | 0.222829  | 0.277298  | -4.042057 |
| 19 | 1 | 0 | -1.329444 | -0.025206 | -4.122943 |
| 20 | 8 | 0 | -2.104714 | 0.173959  | 1.862398  |
| 21 | 1 | 0 | -1.926282 | -0.172473 | 2.750296  |
| 22 | 1 | 0 | -2.914212 | -0.275069 | 1.525095  |
| 23 | 8 | 0 | -1.498565 | -1.214503 | -0.832875 |
| 24 | 1 | 0 | -1.252524 | -1.939994 | -1.427742 |
| 25 | 1 | 0 | -2.305358 | -0.814323 | -1.212745 |
| 26 | 8 | 0 | -1.661624 | 1.794309  | -0.532205 |
| 27 | 1 | 0 | -1.417282 | 2.329287  | -1.314328 |
| 28 | 1 | 0 | -2.175351 | 2.381537  | 0.072677  |
| 29 | 8 | 0 | 3.991878  | -1.628676 | 0.875668  |
| 30 | 8 | 0 | 2.031965  | -3.647888 | 1.078504  |
| 31 | 8 | 0 | 1.665939  | 0.164049  | 4.535230  |
| 32 | 8 | 0 | -0.795169 | -0.990765 | 4.064183  |
| 33 | 8 | 0 | -3.121916 | 3.384358  | 1.035846  |
| 34 | 8 | 0 | -3.692868 | 0.100491  | -1.704347 |
| 35 | 8 | 0 | 3.768375  | -0.148237 | -1.922059 |
| 36 | 8 | 0 | 2.198460  | 0.678555  | -4.065724 |
| 37 | 8 | 0 | 1.460168  | -3.732246 | -1.569006 |
| 38 | 8 | 0 | -1.028545 | -3.337661 | -2.610951 |
| 39 | 8 | 0 | -4.197320 | -1.149821 | 0.832203  |
| 40 | 8 | 0 | 1.685891  | 3.059802  | -2.777382 |
| 41 | 8 | 0 | -0.993545 | 2.951169  | -2.898342 |
| 42 | 8 | 0 | 3.596612  | 2.690815  | 1.262720  |
| 43 | 8 | 0 | 2.138342  | 2.692561  | 3.631776  |
| 44 | 1 | 0 | -4.242389 | -0.837406 | -0.081271 |
| 45 | 1 | 0 | -3.212244 | 0.908826  | -1.482451 |
| 46 | 1 | 0 | -4.058132 | 3.221460  | 0.915626  |
| 47 | 1 | 0 | -3.738561 | -2.002479 | 0.800159  |
| 48 | 1 | 0 | -3.646803 | -0.004983 | -2.669007 |
| 49 | 1 | 0 | -2.939563 | 3.204380  | 1.972156  |
| 50 | 1 | 0 | 3.197962  | 2.683573  | 2.149405  |
| 51 | 1 | 0 | 4.291974  | 2.032535  | 1.292585  |
| 52 | 1 | 0 | 3.359523  | 0.090794  | -2.775296 |
| 53 | 1 | 0 | 4.061742  | 0.682408  | -1.544151 |
| 54 | 1 | 0 | 3.447328  | -2.432607 | 0.891458  |
| 55 | 1 | 0 | 4.144373  | -1.433687 | -0.053071 |
| 56 | 1 | 0 | 2.082741  | 1.593734  | -3.748192 |
| 57 | 1 | 0 | 1.836194  | -3.919061 | 0.163231  |
| 58 | 1 | 0 | 2.058164  | 1.881189  | 4.164104  |
| 59 | 1 | 0 | 2.135099  | 3.435027  | 4.236497  |
| 60 | 1 | 0 | 2.569151  | 0.745185  | -4.946690 |
| 61 | 1 | 0 | 2.172146  | -4.447391 | 1.587306  |
| 62 | 1 | 0 | 0.739355  | 3.270688  | -2.898672 |
| 63 | 1 | 0 | 0.584964  | -3.805017 | -1.989029 |
| 64 | 1 | 0 | 0.759656  | -0.197298 | 4.548980  |
| 65 | 1 | 0 | 2.181602  | 3.871452  | -2.888545 |
| 66 | 1 | 0 | 2.179652  | -0.345779 | 5.162334  |
| 67 | 1 | 0 | 2.107206  | -4.018393 | -2.214839 |
| 68 | 1 | 0 | -0.960781 | 2.066602  | -3.335951 |
| 69 | 1 | 0 | -1.210593 | -1.533600 | 4.735904  |



|    |   |   |           |           |           |
|----|---|---|-----------|-----------|-----------|
| 70 | 1 | 0 | -1.728620 | -3.993050 | -2.584223 |
| 71 | 1 | 0 | -1.615630 | 3.496751  | -3.379811 |
| 72 | 1 | 0 | -0.496647 | -1.593623 | 3.361396  |
| 73 | 1 | 0 | -0.980636 | -3.040016 | -3.521893 |
| 74 | 1 | 0 | -2.751636 | -3.955749 | 1.937111  |
| 75 | 1 | 0 | -2.489399 | -4.063108 | 0.435698  |
| 76 | 1 | 0 | -2.774439 | 2.058507  | 4.053548  |
| 77 | 1 | 0 | -2.175728 | 3.452586  | 4.282184  |
| 78 | 1 | 0 | -3.605061 | 0.034219  | -5.101566 |
| 79 | 1 | 0 | -3.410437 | -1.396012 | -4.600781 |
| 80 | 8 | 0 | -2.285134 | 2.762901  | 3.625046  |
| 81 | 8 | 0 | -3.193370 | -0.482411 | -4.406416 |
| 82 | 8 | 0 | -2.505116 | -3.441212 | 1.165686  |

<sup>a</sup> E(RwB97XD) = -2100.1739537; Zero-point correction = 0.695268 Hartree; Thermal correction to Energy = 0.763957; Thermal correction to Enthalpy = 0.764901; Thermal correction to Gibbs Free Energy = 0.593869; Sum of electronic and zero-point Energies = -2099.478686; Sum of electronic and thermal Energies = -2099.409997; Sum of electronic and thermal Enthalpies = -2099.409053; Sum of electronic and thermal Free Energies = -2099.580084.

**Table S2:** Cartesian coordinates obtained with DFT calculations for the  $[\text{Gd}(\text{H}_2\text{O})_9]^{3+} \cdot 18\text{H}_2\text{O}$  system (wb97XD/LCECP/Def2-TZVPP, 0 imaginary frequencies).<sup>a</sup>

| Center Number | Atomic Number |   | Coordinates (Å) |           |           |
|---------------|---------------|---|-----------------|-----------|-----------|
|               |               |   | X               | Y         | Z         |
| 1             | 64            | 0 | 0.179450        | 0.120792  | 0.063107  |
| 2             | 8             | 0 | 2.164861        | -0.120028 | 1.530944  |
| 3             | 1             | 0 | 2.013842        | -0.140930 | 2.490739  |
| 4             | 1             | 0 | 2.814088        | -0.826584 | 1.334422  |
| 5             | 8             | 0 | 0.156336        | 1.910148  | 1.785465  |
| 6             | 1             | 0 | 0.858876        | 2.269385  | 2.351258  |
| 7             | 1             | 0 | -0.688761       | 2.277049  | 2.088300  |
| 8             | 8             | 0 | 1.784213        | -1.330134 | -1.084712 |
| 9             | 1             | 0 | 1.624880        | -2.218172 | -1.443980 |
| 10            | 1             | 0 | 2.549461        | -0.938733 | -1.555418 |
| 11            | 8             | 0 | 0.058903        | -2.149213 | 1.105431  |
| 12            | 1             | 0 | 0.730374        | -2.851024 | 1.073794  |
| 13            | 1             | 0 | -0.803768       | -2.559884 | 1.267913  |
| 14            | 8             | 0 | 1.918302        | 1.717276  | -0.621791 |
| 15            | 1             | 0 | 1.761051        | 2.429730  | -1.264708 |
| 16            | 1             | 0 | 2.554753        | 2.052435  | 0.044345  |
| 17            | 8             | 0 | 0.074107        | 0.674663  | -2.416940 |
| 18            | 1             | 0 | 0.828131        | 0.746713  | -3.022403 |
| 19            | 1             | 0 | -0.689338       | 0.388670  | -2.939585 |
| 20            | 8             | 0 | -1.744171       | -0.034447 | 1.657749  |
| 21            | 1             | 0 | -1.590886       | -0.192294 | 2.602269  |
| 22            | 1             | 0 | -2.572206       | -0.470586 | 1.400257  |
| 23            | 8             | 0 | -1.581007       | -1.220156 | -1.015171 |
| 24            | 1             | 0 | -1.571311       | -2.132878 | -1.341425 |
| 25            | 1             | 0 | -2.406210       | -0.800311 | -1.308801 |
| 26            | 8             | 0 | -1.602940       | 1.701916  | -0.554428 |
| 27            | 1             | 0 | -1.557381       | 2.334824  | -1.287317 |
| 28            | 1             | 0 | -2.446915       | 1.816717  | -0.080668 |
| 29            | 8             | 0 | 3.967286        | -2.127425 | 1.117099  |
| 30            | 8             | 0 | 2.011563        | -4.070296 | 0.752091  |
| 31            | 8             | 0 | 1.615870        | 0.043536  | 4.244302  |
| 32            | 8             | 0 | -1.123537       | -0.419143 | 4.358560  |

|    |   |   |           |           |           |
|----|---|---|-----------|-----------|-----------|
| 33 | 8 | 0 | -4.008999 | 1.877511  | 0.778439  |
| 34 | 8 | 0 | -3.970899 | -0.064948 | -1.856247 |
| 35 | 8 | 0 | 3.886611  | -0.098755 | -2.273979 |
| 36 | 8 | 0 | 2.269588  | 1.379767  | -3.968903 |
| 37 | 8 | 0 | 1.259488  | -3.930744 | -1.852202 |
| 38 | 8 | 0 | -1.483355 | -3.793114 | -2.103363 |
| 39 | 8 | 0 | -4.186164 | -1.144047 | 0.850530  |
| 40 | 8 | 0 | 1.414367  | 3.576214  | -2.604136 |
| 41 | 8 | 0 | -1.361355 | 3.600094  | -2.609209 |
| 42 | 8 | 0 | 3.747186  | 2.649111  | 1.171140  |
| 43 | 8 | 0 | 2.210487  | 2.587220  | 3.488677  |
| 44 | 1 | 0 | -4.245986 | -1.094223 | -0.110392 |
| 45 | 1 | 0 | -4.033898 | 0.837233  | -1.534090 |
| 46 | 1 | 0 | -4.220942 | 0.981716  | 1.061108  |
| 47 | 1 | 0 | -3.801850 | -2.011435 | 1.049731  |
| 48 | 1 | 0 | -3.558614 | 0.000623  | -2.733185 |
| 49 | 1 | 0 | -3.559293 | 2.283158  | 1.537104  |
| 50 | 1 | 0 | 3.296862  | 2.627474  | 2.032325  |
| 51 | 1 | 0 | 4.407046  | 1.956296  | 1.221535  |
| 52 | 1 | 0 | 3.420071  | 0.438488  | -2.937825 |
| 53 | 1 | 0 | 4.098468  | 0.524864  | -1.576758 |
| 54 | 1 | 0 | 3.363906  | -2.873424 | 0.956896  |
| 55 | 1 | 0 | 4.422934  | -1.990142 | 0.285794  |
| 56 | 1 | 0 | 2.087907  | 2.293216  | -3.684527 |
| 57 | 1 | 0 | 1.807647  | -4.247500 | -0.184341 |
| 58 | 1 | 0 | 2.098946  | 1.752747  | 3.978559  |
| 59 | 1 | 0 | 2.163348  | 3.302914  | 4.122543  |
| 60 | 1 | 0 | 2.289243  | 1.375597  | -4.925871 |
| 61 | 1 | 0 | 2.019176  | -4.911818 | 1.208510  |
| 62 | 1 | 0 | 0.444256  | 3.657222  | -2.645971 |
| 63 | 1 | 0 | 0.300080  | -3.994500 | -2.006562 |
| 64 | 1 | 0 | 0.664048  | -0.127817 | 4.359528  |
| 65 | 1 | 0 | 1.768872  | 4.464903  | -2.565278 |
| 66 | 1 | 0 | 2.077361  | -0.511623 | 4.873436  |
| 67 | 1 | 0 | 1.694428  | -4.330841 | -2.605648 |
| 68 | 1 | 0 | -1.718543 | 3.302628  | -3.448233 |
| 69 | 1 | 0 | -1.596167 | 0.180102  | 4.940120  |
| 70 | 1 | 0 | -1.987616 | -4.482179 | -1.666265 |
| 71 | 1 | 0 | -1.792111 | 4.437299  | -2.424458 |
| 72 | 1 | 0 | -1.338588 | -1.301837 | 4.667823  |
| 73 | 1 | 0 | -1.806863 | -3.767259 | -3.006482 |
| 74 | 1 | 0 | -2.571592 | -3.352116 | 2.634334  |
| 75 | 1 | 0 | -2.618722 | -4.163670 | 1.344477  |
| 76 | 1 | 0 | -2.442293 | 2.876255  | 3.600492  |
| 77 | 1 | 0 | -2.255726 | 4.023493  | 2.610041  |
| 78 | 1 | 0 | -2.305464 | 0.526101  | -4.760481 |
| 79 | 1 | 0 | -2.087766 | -0.939106 | -4.385642 |
| 80 | 8 | 0 | -2.278392 | 3.066608  | 2.674846  |
| 81 | 8 | 0 | -2.190627 | -0.061733 | -4.011145 |
| 82 | 8 | 0 | -2.498109 | -3.273478 | 1.680797  |

-----  
<sup>a</sup>E(RwB97XD) = -2100.1677143 ; Zero-point correction = 0.692793 Hartree; Thermal correction to Energy = 0.763807; Thermal correction to Enthalpy = 0.764751; Thermal correction to Gibbs Free Energy = 0.589295; Sum of electronic and zero-point Energies = -2099.474921; Sum of electronic and thermal Energies = -2099.403907; Sum of electronic and thermal Enthalpies = -2099.402963; Sum of electronic and thermal Free Energies = -2099.578419.

**Table S3:** Cartesian coordinates obtained with DFT calculations for the transition state responsible for the  $[\text{Gd}(\text{H}_2\text{O})_9]^{3+} \cdot 18\text{H}_2\text{O} \leftrightarrow [\text{Gd}(\text{H}_2\text{O})_8]^{3+} \cdot 19\text{H}_2\text{O}$  interconversion (wB97XD/LCECP/Def2-TZVPP, 1 imaginary frequency).<sup>a</sup>

| Center Number | Atomic Number | Coordinates (Å) |             |   |
|---------------|---------------|-----------------|-------------|---|
|               |               | X               | Y           | Z |
| Gd            | -0.07395910   | 0.17792057      | 0.37343719  |   |
| O             | 1.97352872    | -0.05103452     | 1.67597338  |   |
| H             | 1.99070132    | -0.02244538     | 2.64817963  |   |
| H             | 2.72573709    | -0.60353577     | 1.37143393  |   |
| O             | -0.06672938   | 1.99171009      | 2.02698649  |   |
| H             | 0.71129886    | 2.36241922      | 2.48103989  |   |
| H             | -0.83147150   | 2.18858024      | 2.59341123  |   |
| O             | 1.40244240    | -1.14668309     | -0.98721566 |   |
| H             | 1.42358358    | -2.09243616     | -1.21561395 |   |
| H             | 2.25283353    | -0.76113216     | -1.28393507 |   |
| O             | -0.16472101   | -2.07093502     | 1.54225319  |   |
| H             | 0.61143954    | -2.66401605     | 1.47368159  |   |
| H             | -0.95880750   | -2.60179213     | 1.33747312  |   |
| O             | 1.53419592    | 1.74844239      | -0.53215865 |   |
| H             | 1.57208490    | 2.28624609      | -1.34314683 |   |
| H             | 2.23828115    | 2.09001714      | 0.06473558  |   |
| O             | -0.39117912   | 0.54896328      | -3.02104439 |   |
| H             | 0.46263500    | 0.37602165      | -3.44541029 |   |
| H             | -1.06595145   | 0.02156814      | -3.47012896 |   |
| O             | -2.12996317   | 0.15294745      | 1.77526482  |   |
| H             | -1.93010122   | -0.15165124     | 2.67422608  |   |
| H             | -2.94569233   | -0.31543130     | 1.48285365  |   |
| O             | -1.57567022   | -1.29450586     | -0.85781540 |   |
| H             | -1.33163072   | -2.00511352     | -1.47326763 |   |
| H             | -2.40642259   | -0.90375606     | -1.19224158 |   |
| O             | -1.73453410   | 1.79857986      | -0.54395972 |   |
| H             | -1.50106866   | 2.39606181      | -1.27946972 |   |
| H             | -2.24899114   | 2.33677799      | 0.10643262  |   |
| O             | 3.94926652    | -1.69379513     | 0.83560468  |   |
| O             | 1.98895516    | -3.69105978     | 1.11076239  |   |
| O             | 1.67261087    | 0.21689714      | 4.39892980  |   |
| O             | -0.80799083   | -0.92271350     | 4.00061013  |   |
| O             | -3.22668380   | 3.27908451      | 1.09128795  |   |
| O             | -3.76503162   | 0.09572801      | -1.63536660 |   |
| O             | 3.77482446    | -0.22136793     | -1.89835595 |   |
| O             | 2.25244946    | 0.77585056      | -3.96605692 |   |
| O             | 1.41668530    | -3.84576206     | -1.52916905 |   |
| O             | -1.04765429   | -3.40228297     | -2.61632121 |   |
| O             | -4.24753812   | -1.22095091     | 0.87209781  |   |
| O             | 1.68573275    | 3.21805118      | -2.85333569 |   |
| O             | -1.00917428   | 3.10922573      | -2.85429761 |   |
| O             | 3.44984836    | 2.78024103      | 1.06297577  |   |
| O             | 2.11447576    | 2.74200364      | 3.49219586  |   |
| H             | -4.32881870   | -0.91742271     | -0.04127074 |   |
| H             | -3.25619862   | 0.87707570      | -1.37400460 |   |
| H             | -4.14774818   | 3.02947485      | 1.00790742  |   |
| H             | -3.78569701   | -2.07181767     | 0.83380425  |   |
| H             | -3.64731036   | 0.01050354      | -2.59511853 |   |
| H             | -2.99185229   | 3.11745918      | 2.01914008  |   |
| H             | 3.09149832    | 2.77019627      | 1.96655795  |   |
| H             | 4.22999904    | 2.22547804      | 1.09504697  |   |
| H             | 3.38408802    | 0.09293794      | -2.73541897 |   |
| H             | 4.06104102    | 0.57561756      | -1.44952143 |   |

|   |             |             |             |
|---|-------------|-------------|-------------|
| H | 3.40592066  | -2.49710894 | 0.88662354  |
| H | 4.11421073  | -1.54596645 | -0.09969629 |
| H | 2.16696195  | 1.72313761  | -3.75427092 |
| H | 1.79066564  | -3.98807722 | 0.20402928  |
| H | 2.05388697  | 1.93395106  | 4.03214530  |
| H | 2.07717110  | 3.49152462  | 4.08687049  |
| H | 2.47478647  | 0.71860013  | -4.89593963 |
| H | 2.11686945  | -4.47540298 | 1.64569935  |
| H | 0.75196157  | 3.47416843  | -2.96584117 |
| H | 0.54019267  | -3.91360395 | -1.94664647 |
| H | 0.76290499  | -0.13403005 | 4.43595983  |
| H | 2.20945916  | 4.01961188  | -2.84187085 |
| H | 2.19504036  | -0.29554510 | 5.01667695  |
| H | 2.05719708  | -4.16424409 | -2.16636336 |
| H | -0.87415345 | 2.17965079  | -3.14505118 |
| H | -1.22333757 | -1.43413088 | 4.69668101  |
| H | -1.76082130 | -4.04418768 | -2.60945754 |
| H | -1.66939560 | 3.50216955  | -3.42573177 |
| H | -0.52149211 | -1.55534715 | 3.31944561  |
| H | -0.93987831 | -3.13783509 | -3.53242133 |
| H | -2.74486697 | -4.01390771 | 1.94332063  |
| H | -2.50141578 | -4.10448477 | 0.43738090  |
| H | -2.65600474 | 2.06439446  | 4.14615010  |
| H | -2.03186540 | 3.46249878  | 4.23114925  |
| H | -2.99576468 | 0.29669388  | -4.91864806 |
| H | -3.02508059 | -1.19726881 | -4.59935432 |
| O | -2.20913601 | 2.73704156  | 3.62956090  |
| O | -2.81374455 | -0.34020777 | -4.22502139 |
| O | -2.52160950 | -3.48837099 | 1.17225479  |

<sup>a</sup> E(RwB97XD) = -2100.1705257 Hartree; Zero-point correction = 0.695785; Thermal correction to Energy = 0.763732; Thermal correction to Enthalpy = 0.764676; Thermal correction to Gibbs Free Energy = 0.595320; Sum of electronic and zero-point Energies = -2099.474741; Sum of electronic and thermal Energies = -2099.406794; Sum of electronic and thermal Enthalpies = -2099.405850; Sum of electronic and thermal Free Energies = -2099.575206.

**Table S4:** Cartesian coordinates obtained with DFT calculations for the [Gd(EDTA)(H<sub>2</sub>O)<sub>3</sub>]<sup>-</sup>·4H<sub>2</sub>O system (wb97XD/LCECP/Def2-TZVPP, 0 imaginary frequencies).<sup>a</sup>

| Center Number | Atomic Number |   | Coordinates (Å) |          |           |
|---------------|---------------|---|-----------------|----------|-----------|
|               |               |   | X               | Y        | Z         |
| 1             | 64            | 0 | 2.946486        | 7.277871 | 2.400948  |
| 2             | 8             | 0 | 4.550157        | 5.996373 | 3.515464  |
| 3             | 8             | 0 | 1.250244        | 7.246279 | 4.122287  |
| 4             | 8             | 0 | 0.975684        | 6.707582 | 1.177268  |
| 5             | 8             | 0 | 3.592628        | 7.892131 | 0.127430  |
| 6             | 8             | 0 | 5.091301        | 5.129611 | 5.475728  |
| 7             | 8             | 0 | -0.585850       | 6.435000 | 5.078152  |
| 8             | 8             | 0 | -0.125178       | 5.669103 | -0.449563 |
| 9             | 8             | 0 | 5.197414        | 7.529000 | -1.376775 |
| 10            | 6             | 0 | 4.316851        | 5.264279 | 4.522450  |
| 11            | 6             | 0 | 2.960925        | 4.568135 | 4.565004  |
| 12            | 1             | 0 | 3.113018        | 3.501044 | 4.754350  |
| 13            | 1             | 0 | 2.454240        | 4.968446 | 5.443352  |
| 14            | 6             | 0 | 0.723875        | 4.946568 | 3.766119  |
| 15            | 1             | 0 | 0.387014        | 4.156847 | 4.443862  |
| 16            | 1             | 0 | 0.105726        | 4.897828 | 2.869943  |

|    |   |   |           |           |           |
|----|---|---|-----------|-----------|-----------|
| 17 | 6 | 0 | 0.423125  | 6.307336  | 4.394250  |
| 18 | 6 | 0 | 4.447085  | 7.158642  | -0.480202 |
| 19 | 6 | 0 | 4.537650  | 5.704825  | 0.004540  |
| 20 | 1 | 0 | 4.785432  | 5.054044  | -0.838954 |
| 21 | 1 | 0 | 5.367040  | 5.662735  | 0.714089  |
| 22 | 6 | 0 | 2.189604  | 5.217824  | -0.256031 |
| 23 | 1 | 0 | 1.965213  | 4.183199  | -0.523465 |
| 24 | 1 | 0 | 2.465381  | 5.716897  | -1.185154 |
| 25 | 6 | 0 | 0.896492  | 5.899392  | 0.188281  |
| 26 | 6 | 0 | 2.307114  | 3.766444  | 2.349874  |
| 27 | 1 | 0 | 1.394867  | 3.721088  | 1.756399  |
| 28 | 1 | 0 | 2.429798  | 2.776561  | 2.801810  |
| 29 | 6 | 0 | 3.483686  | 4.032237  | 1.425615  |
| 30 | 1 | 0 | 4.407012  | 4.098661  | 1.995840  |
| 31 | 1 | 0 | 3.580183  | 3.187045  | 0.733786  |
| 32 | 7 | 0 | 3.312772  | 5.291252  | 0.689231  |
| 33 | 7 | 0 | 2.125836  | 4.798820  | 3.381058  |
| 34 | 8 | 0 | 5.469152  | 8.127420  | 2.176209  |
| 35 | 1 | 0 | 5.411165  | 9.060801  | 1.925033  |
| 36 | 1 | 0 | 5.878005  | 8.074632  | 3.049560  |
| 37 | 8 | 0 | 1.844116  | 9.581938  | 2.208404  |
| 38 | 1 | 0 | 1.009526  | 9.533004  | 1.695631  |
| 39 | 1 | 0 | 1.589233  | 9.890954  | 3.094854  |
| 40 | 8 | 0 | 3.714314  | 8.826341  | 4.291320  |
| 41 | 1 | 0 | 4.508387  | 8.550229  | 4.781036  |
| 42 | 1 | 0 | 3.072602  | 9.218487  | 4.895350  |
| 43 | 8 | 0 | 6.119856  | 7.778171  | 5.067447  |
| 44 | 8 | 0 | 4.391986  | 10.432158 | 0.862877  |
| 45 | 8 | 0 | 1.221091  | 9.756556  | 4.909789  |
| 46 | 8 | 0 | -0.478655 | 8.970406  | 0.969582  |
| 47 | 1 | 0 | 0.538290  | 10.162160 | 5.441719  |
| 48 | 1 | 0 | 0.990958  | 8.808090  | 4.784462  |
| 49 | 1 | 0 | 5.923506  | 6.835656  | 5.226799  |
| 50 | 1 | 0 | 6.707957  | 8.065633  | 5.765313  |
| 51 | 1 | 0 | 3.614717  | 10.553410 | 1.419230  |
| 52 | 1 | 0 | 4.148931  | 9.640025  | 0.349994  |
| 53 | 1 | 0 | -0.613539 | 9.188143  | 0.047116  |
| 54 | 1 | 0 | -0.131927 | 8.053881  | 0.979550  |

-----  
E(RwB97XD) = -1671.3904055 Hartree; Zero-point correction = 0.420577; Thermal correction to Energy = 0.457480; Thermal correction to Enthalpy = 0.458424; Thermal correction to Gibbs Free Energy = 0.353910; Sum of electronic and zero-point Energies = -1670.969828; Sum of electronic and thermal Energies = -1670.932926; Sum of electronic and thermal Enthalpies = -1670.931981; Sum of electronic and thermal Free Energies = -1671.036495.

**Table S5:** Cartesian coordinates obtained with DFT calculations for the [Gd(EDTA)(H<sub>2</sub>O)<sub>2</sub>]<sup>-</sup>·5H<sub>2</sub>O system (wB97XD/LCECP/Def2-TZVPP, 0 imaginary frequencies).<sup>a</sup>

| Center Number | Atomic Number |   | Coordinates (Å) |          |          |
|---------------|---------------|---|-----------------|----------|----------|
|               |               |   | X               | Y        | Z        |
| 1             | 64            | 0 | 2.719263        | 7.225956 | 2.345499 |
| 2             | 8             | 0 | 4.503552        | 6.072293 | 3.289898 |
| 3             | 8             | 0 | 1.128186        | 7.248233 | 4.145365 |
| 4             | 8             | 0 | 0.831480        | 6.600445 | 1.086453 |
| 5             | 8             | 0 | 3.790529        | 7.834153 | 0.293061 |
| 6             | 8             | 0 | 5.236365        | 5.121748 | 5.150989 |
| 7             | 8             | 0 | -0.455047       | 6.339141 | 5.417519 |

|    |   |   |           |           |           |
|----|---|---|-----------|-----------|-----------|
| 8  | 8 | 0 | -0.208356 | 5.503631  | -0.542930 |
| 9  | 8 | 0 | 5.350088  | 7.406902  | -1.239279 |
| 10 | 6 | 0 | 4.374748  | 5.293401  | 4.283765  |
| 11 | 6 | 0 | 3.030248  | 4.586200  | 4.450288  |
| 12 | 1 | 0 | 3.207238  | 3.519496  | 4.614614  |
| 13 | 1 | 0 | 2.616045  | 4.977121  | 5.380096  |
| 14 | 6 | 0 | 0.704909  | 4.918077  | 3.902062  |
| 15 | 1 | 0 | 0.469880  | 4.108615  | 4.597693  |
| 16 | 1 | 0 | 0.000989  | 4.856440  | 3.071245  |
| 17 | 6 | 0 | 0.425960  | 6.263737  | 4.571859  |
| 18 | 6 | 0 | 4.561289  | 7.053232  | -0.374452 |
| 19 | 6 | 0 | 4.489834  | 5.573373  | 0.013296  |
| 20 | 1 | 0 | 4.705625  | 4.955367  | -0.862421 |
| 21 | 1 | 0 | 5.287741  | 5.410363  | 0.740171  |
| 22 | 6 | 0 | 2.135848  | 5.201199  | -0.356090 |
| 23 | 1 | 0 | 1.970877  | 4.191030  | -0.737811 |
| 24 | 1 | 0 | 2.429770  | 5.812447  | -1.210785 |
| 25 | 6 | 0 | 0.797271  | 5.787290  | 0.092518  |
| 26 | 6 | 0 | 2.136974  | 3.774936  | 2.325362  |
| 27 | 1 | 0 | 1.207409  | 3.803719  | 1.758556  |
| 28 | 1 | 0 | 2.197849  | 2.778548  | 2.775769  |
| 29 | 6 | 0 | 3.305780  | 3.960990  | 1.378991  |
| 30 | 1 | 0 | 4.241706  | 3.960952  | 1.932582  |
| 31 | 1 | 0 | 3.336444  | 3.110251  | 0.688982  |
| 32 | 7 | 0 | 3.214127  | 5.228320  | 0.641162  |
| 33 | 7 | 0 | 2.064528  | 4.814960  | 3.364997  |
| 34 | 8 | 0 | 6.646744  | 9.053943  | 2.528326  |
| 35 | 1 | 0 | 5.842396  | 9.486792  | 2.205687  |
| 36 | 1 | 0 | 6.414216  | 8.639196  | 3.366517  |
| 37 | 8 | 0 | 1.668658  | 9.527813  | 2.120237  |
| 38 | 1 | 0 | 0.826460  | 9.479346  | 1.619919  |
| 39 | 1 | 0 | 1.441295  | 9.872490  | 3.001089  |
| 40 | 8 | 0 | 3.720750  | 8.810717  | 4.043587  |
| 41 | 1 | 0 | 4.478655  | 8.498762  | 4.573015  |
| 42 | 1 | 0 | 3.108643  | 9.293853  | 4.615254  |
| 43 | 8 | 0 | 6.018752  | 7.808856  | 5.132800  |
| 44 | 8 | 0 | 4.487605  | 10.345651 | 1.115904  |
| 45 | 8 | 0 | 1.293910  | 9.791578  | 4.839563  |
| 46 | 8 | 0 | -0.648693 | 8.875400  | 0.889193  |
| 47 | 1 | 0 | 0.728141  | 10.257073 | 5.453571  |
| 48 | 1 | 0 | 1.006660  | 8.853299  | 4.802499  |
| 49 | 1 | 0 | 5.897563  | 6.839038  | 5.155162  |
| 50 | 1 | 0 | 6.392592  | 8.063427  | 5.976116  |
| 51 | 1 | 0 | 3.678236  | 10.497449 | 1.611565  |
| 52 | 1 | 0 | 4.296275  | 9.520853  | 0.633429  |
| 53 | 1 | 0 | -0.797223 | 9.103973  | -0.028607 |
| 54 | 1 | 0 | -0.308291 | 7.959120  | 0.884413  |

-----  
E(RwB97XD) = -1671.3922758 Hartree; Zero-point correction = 0.419738; Thermal correction to Energy = 0.457083; Thermal correction to Enthalpy = 0.458027; Thermal correction to Gibbs Free Energy = 0.351942; Sum of electronic and zero-point Energies = -1670.972538; Sum of electronic and thermal Energies = -1670.935193; Sum of electronic and thermal Enthalpies = -1670.934249; Sum of electronic and thermal Free Energies = -1671.040334.

**Table S6:** Cartesian coordinates obtained with DFT calculations for the transition state responsible for the [Gd(EDTA)(H<sub>2</sub>O)<sub>2</sub>]<sup>-</sup>·5H<sub>2</sub>O ↔ [Gd(EDTA)(H<sub>2</sub>O)<sub>3</sub>]<sup>-</sup>·4H<sub>2</sub>O interconversion (wB97XD/LCECP/Def2-TZVPP, 1 imaginary frequency).<sup>a</sup>

-----

| Center<br>Number | Atomic<br>Number |   | Coordinates (Å) |           |           |
|------------------|------------------|---|-----------------|-----------|-----------|
|                  |                  |   | X               | Y         | Z         |
| 1                | 64               | 0 | 2.845674        | 7.251935  | 2.381061  |
| 2                | 8                | 0 | 4.518770        | 6.051627  | 3.458179  |
| 3                | 8                | 0 | 1.197050        | 7.252230  | 4.132322  |
| 4                | 8                | 0 | 0.919615        | 6.657422  | 1.139560  |
| 5                | 8                | 0 | 3.669966        | 7.894100  | 0.220103  |
| 6                | 8                | 0 | 5.121402        | 5.150056  | 5.386686  |
| 7                | 8                | 0 | -0.542794       | 6.389739  | 5.217027  |
| 8                | 8                | 0 | -0.152422       | 5.573424  | -0.476835 |
| 9                | 8                | 0 | 5.219076        | 7.523300  | -1.338416 |
| 10               | 6                | 0 | 4.321890        | 5.295553  | 4.456430  |
| 11               | 6                | 0 | 2.975370        | 4.582352  | 4.528014  |
| 12               | 1                | 0 | 3.144636        | 3.515720  | 4.701931  |
| 13               | 1                | 0 | 2.490138        | 4.968038  | 5.424880  |
| 14               | 6                | 0 | 0.707842        | 4.941975  | 3.802734  |
| 15               | 1                | 0 | 0.401468        | 4.137062  | 4.476132  |
| 16               | 1                | 0 | 0.064849        | 4.902692  | 2.923220  |
| 17               | 6                | 0 | 0.415897        | 6.290516  | 4.462290  |
| 18               | 6                | 0 | 4.481558        | 7.149084  | -0.435673 |
| 19               | 6                | 0 | 4.529305        | 5.680483  | 0.005077  |
| 20               | 1                | 0 | 4.768946        | 5.046153  | -0.852512 |
| 21               | 1                | 0 | 5.348826        | 5.600623  | 0.722716  |
| 22               | 6                | 0 | 2.181818        | 5.213001  | -0.297175 |
| 23               | 1                | 0 | 1.992792        | 4.184956  | -0.613569 |
| 24               | 1                | 0 | 2.459053        | 5.763960  | -1.196547 |
| 25               | 6                | 0 | 0.863258        | 5.840579  | 0.152562  |
| 26               | 6                | 0 | 2.253479        | 3.778337  | 2.335517  |
| 27               | 1                | 0 | 1.338397        | 3.756507  | 1.745255  |
| 28               | 1                | 0 | 2.353737        | 2.785896  | 2.786898  |
| 29               | 6                | 0 | 3.434681        | 4.020749  | 1.412013  |
| 30               | 1                | 0 | 4.358059        | 4.074248  | 1.983916  |
| 31               | 1                | 0 | 3.520123        | 3.170874  | 0.725072  |
| 32               | 7                | 0 | 3.287215        | 5.279634  | 0.669132  |
| 33               | 7                | 0 | 2.100358        | 4.813339  | 3.370820  |
| 34               | 8                | 0 | 5.975871        | 8.274178  | 2.173882  |
| 35               | 1                | 0 | 5.562165        | 9.139069  | 2.056232  |
| 36               | 1                | 0 | 6.092052        | 8.146841  | 3.122042  |
| 37               | 8                | 0 | 1.741468        | 9.549911  | 2.165491  |
| 38               | 1                | 0 | 0.905938        | 9.496918  | 1.654412  |
| 39               | 1                | 0 | 1.496873        | 9.878355  | 3.047776  |
| 40               | 8                | 0 | 3.764042        | 8.850037  | 4.126822  |
| 41               | 1                | 0 | 4.522169        | 8.542682  | 4.657627  |
| 42               | 1                | 0 | 3.128341        | 9.298650  | 4.700739  |
| 43               | 8                | 0 | 6.072034        | 7.792182  | 5.129970  |
| 44               | 8                | 0 | 4.370512        | 10.429249 | 1.041199  |
| 45               | 8                | 0 | 1.305223        | 9.778266  | 4.880312  |
| 46               | 8                | 0 | -0.568528       | 8.910378  | 0.920989  |
| 47               | 1                | 0 | 0.710432        | 10.221396 | 5.483286  |
| 48               | 1                | 0 | 1.032850        | 8.836721  | 4.810037  |
| 49               | 1                | 0 | 5.890251        | 6.840509  | 5.257781  |
| 50               | 1                | 0 | 6.575693        | 8.088810  | 5.887397  |
| 51               | 1                | 0 | 3.562937        | 10.505439 | 1.560196  |
| 52               | 1                | 0 | 4.194320        | 9.629419  | 0.514738  |
| 53               | 1                | 0 | -0.704092       | 9.129318  | -0.001145 |
| 54               | 1                | 0 | -0.218091       | 7.996706  | 0.929658  |

E(RwB97XD) = -1671.3885565 Hartree; Zero-point correction = 0.420425; Thermal correction to Energy = 0.456627; Thermal correction to Enthalpy = 0.457571; Thermal correction to Gibbs Free Energy =

0.354951; Sum of electronic and zero-point Energies = -1670.968132; Sum of electronic and thermal Energies = -1670.931930; Sum of electronic and thermal Enthalpies = -1670.930985; Sum of electronic and thermal Free Energies = -1671.033606.

**Table S7:** Cartesian coordinates obtained with DFT calculations for the  $[\text{Gd}(\text{CDTA})(\text{H}_2\text{O})_3]^- \cdot 4\text{H}_2\text{O}$  system (wB97XD/LCECP/Def2-TZVPP, 0 imaginary frequencies).<sup>a</sup>

| Center Number | Atomic Number |   | Coordinates (Å) |           |           |
|---------------|---------------|---|-----------------|-----------|-----------|
|               |               |   | X               | Y         | Z         |
| 1             | 64            | 0 | 2.842334        | 7.202388  | 2.414553  |
| 2             | 8             | 0 | 4.513486        | 5.798152  | 3.356958  |
| 3             | 8             | 0 | 0.943161        | 7.343611  | 3.910009  |
| 4             | 8             | 0 | 0.881869        | 6.945375  | 1.059069  |
| 5             | 8             | 0 | 3.478652        | 7.854638  | 0.166434  |
| 6             | 8             | 0 | 5.016868        | 5.004478  | 5.362901  |
| 7             | 8             | 0 | -0.860702       | 6.488184  | 4.888730  |
| 8             | 8             | 0 | 0.225129        | 6.667890  | -1.046946 |
| 9             | 8             | 0 | 4.876658        | 7.396836  | -1.505075 |
| 10            | 6             | 0 | 4.221641        | 5.205456  | 4.437821  |
| 11            | 6             | 0 | 2.756075        | 4.822440  | 4.622417  |
| 12            | 1             | 0 | 2.675785        | 3.880250  | 5.164069  |
| 13            | 1             | 0 | 2.354865        | 5.593073  | 5.283675  |
| 14            | 6             | 0 | 0.549923        | 4.998310  | 3.693832  |
| 15            | 1             | 0 | 0.201703        | 4.239927  | 4.400660  |
| 16            | 1             | 0 | -0.021418       | 4.881803  | 2.772589  |
| 17            | 6             | 0 | 0.167969        | 6.379705  | 4.229603  |
| 18            | 6             | 0 | 4.198642        | 7.068070  | -0.536906 |
| 19            | 6             | 0 | 4.238940        | 5.606533  | -0.076062 |
| 20            | 1             | 0 | 4.416883        | 4.976695  | -0.950350 |
| 21            | 1             | 0 | 5.107429        | 5.515215  | 0.581124  |
| 22            | 6             | 0 | 1.868476        | 5.177306  | -0.206119 |
| 23            | 1             | 0 | 1.243129        | 4.315987  | 0.027379  |
| 24            | 1             | 0 | 2.159757        | 5.066126  | -1.251249 |
| 25            | 6             | 0 | 0.926134        | 6.373123  | -0.084558 |
| 26            | 6             | 0 | 2.189660        | 3.687216  | 2.464903  |
| 27            | 1             | 0 | 1.244353        | 3.568015  | 1.933287  |
| 28            | 6             | 0 | 3.272349        | 3.924263  | 1.399177  |
| 29            | 1             | 0 | 4.225422        | 4.046096  | 1.910337  |
| 30            | 7             | 0 | 3.046233        | 5.201559  | 0.675960  |
| 31            | 7             | 0 | 1.974892        | 4.853911  | 3.376461  |
| 32            | 8             | 0 | 5.205739        | 8.206401  | 2.321725  |
| 33            | 1             | 0 | 5.254987        | 9.102425  | 1.955385  |
| 34            | 1             | 0 | 5.716534        | 8.151277  | 3.140497  |
| 35            | 8             | 0 | 2.172948        | 9.667853  | 2.357786  |
| 36            | 1             | 0 | 1.376672        | 9.754957  | 1.785918  |
| 37            | 1             | 0 | 1.888948        | 9.950330  | 3.245210  |
| 38            | 8             | 0 | 3.480389        | 8.123692  | 4.716998  |
| 39            | 1             | 0 | 4.409352        | 8.173849  | 4.990516  |
| 40            | 1             | 0 | 2.963111        | 8.813042  | 5.149981  |
| 41            | 8             | 0 | 6.160357        | 7.599716  | 4.960998  |
| 42            | 8             | 0 | 4.449771        | 10.382968 | 0.764094  |
| 43            | 8             | 0 | 1.284902        | 9.735983  | 4.963494  |
| 44            | 8             | 0 | -0.058661       | 9.463406  | 0.879917  |
| 45            | 1             | 0 | 0.633205        | 10.234707 | 5.453820  |
| 46            | 1             | 0 | 0.888144        | 8.871223  | 4.714199  |
| 47            | 1             | 0 | 5.976258        | 6.650687  | 5.093622  |



|    |   |   |           |           |           |
|----|---|---|-----------|-----------|-----------|
| 48 | 1 | 0 | 6.798896  | 7.858521  | 5.624780  |
| 49 | 1 | 0 | 3.709947  | 10.522955 | 1.368189  |
| 50 | 1 | 0 | 4.160722  | 9.585326  | 0.285469  |
| 51 | 1 | 0 | -0.048220 | 9.753545  | -0.032463 |
| 52 | 1 | 0 | 0.123019  | 8.497920  | 0.850504  |
| 53 | 6 | 0 | 2.440694  | 2.368745  | 3.201886  |
| 54 | 1 | 0 | 1.650464  | 2.209419  | 3.937479  |
| 55 | 1 | 0 | 3.384943  | 2.423990  | 3.749460  |
| 56 | 6 | 0 | 3.386413  | 2.713884  | 0.463189  |
| 57 | 1 | 0 | 2.470708  | 2.607623  | -0.123623 |
| 58 | 1 | 0 | 4.196602  | 2.884296  | -0.245926 |
| 59 | 6 | 0 | 3.624813  | 1.415505  | 1.223117  |
| 60 | 6 | 0 | 2.518955  | 1.188039  | 2.243163  |
| 61 | 1 | 0 | 2.695663  | 0.270920  | 2.806181  |
| 62 | 1 | 0 | 1.562470  | 1.066372  | 1.726107  |
| 63 | 1 | 0 | 4.588926  | 1.461775  | 1.738284  |
| 64 | 1 | 0 | 3.679916  | 0.583271  | 0.520424  |

-----  
E(RwB97XD) = -1827.456389 Hartree; Zero-point correction = 0.515099; Thermal correction to Energy = 0.555326; Thermal correction to Enthalpy = 0.556270; Thermal correction to Gibbs Free Energy = 0.445460; Sum of electronic and zero-point Energies = -1826.941290; Sum of electronic and thermal Energies = -1826.901063; Sum of electronic and thermal Enthalpies = -1826.900119; Sum of electronic and thermal Free Energies = -1827.010929.

**Table S8:** Cartesian coordinates obtained with DFT calculations for the [Gd(CDTA)(H<sub>2</sub>O)<sub>2</sub>]<sup>-</sup>·5H<sub>2</sub>O system (wB97XD/LCECP/Def2-TZVPP, 0 imaginary frequencies).<sup>a</sup>

| Center Number | Atomic Number |   | Coordinates (Å) |          |           |
|---------------|---------------|---|-----------------|----------|-----------|
|               |               |   | X               | Y        | Z         |
| 1             | 64            | 0 | 2.690493        | 7.198130 | 2.352353  |
| 2             | 8             | 0 | 4.477252        | 5.932008 | 3.256998  |
| 3             | 8             | 0 | 0.930560        | 7.298941 | 3.974502  |
| 4             | 8             | 0 | 0.774790        | 6.898672 | 1.009152  |
| 5             | 8             | 0 | 3.508786        | 7.845759 | 0.205622  |
| 6             | 8             | 0 | 5.104125        | 5.024943 | 5.182374  |
| 7             | 8             | 0 | -0.799291       | 6.416829 | 5.059478  |
| 8             | 8             | 0 | 0.093874        | 6.571011 | -1.080439 |
| 9             | 8             | 0 | 4.766338        | 7.371232 | -1.568973 |
| 10            | 6             | 0 | 4.259543        | 5.262942 | 4.311909  |
| 11            | 6             | 0 | 2.817109        | 4.830380 | 4.561413  |
| 12            | 1             | 0 | 2.796031        | 3.884712 | 5.100919  |
| 13            | 1             | 0 | 2.428579        | 5.581411 | 5.253205  |
| 14            | 6             | 0 | 0.555467        | 4.951743 | 3.770078  |
| 15            | 1             | 0 | 0.269726        | 4.183871 | 4.493625  |
| 16            | 1             | 0 | -0.069873       | 4.824376 | 2.885785  |
| 17            | 6             | 0 | 0.184725        | 6.322851 | 4.337872  |
| 18            | 6             | 0 | 4.139494        | 7.042826 | -0.570829 |
| 19            | 6             | 0 | 4.141223        | 5.570303 | -0.148945 |
| 20            | 1             | 0 | 4.277253        | 4.957533 | -1.042100 |
| 21            | 1             | 0 | 5.024689        | 5.439775 | 0.480518  |
| 22            | 6             | 0 | 1.772347        | 5.120235 | -0.239340 |
| 23            | 1             | 0 | 1.161662        | 4.254003 | 0.013635  |
| 24            | 1             | 0 | 2.052066        | 4.998755 | -1.286106 |
| 25            | 6             | 0 | 0.812129        | 6.302166 | -0.125879 |
| 26            | 6             | 0 | 2.148577        | 3.673496 | 2.449136  |
| 27            | 1             | 0 | 1.191635        | 3.563477 | 1.936848  |
| 28            | 6             | 0 | 3.213294        | 3.909391 | 1.368005  |

|    |   |   |           |           |           |
|----|---|---|-----------|-----------|-----------|
| 29 | 1 | 0 | 4.171426  | 4.051628  | 1.865893  |
| 30 | 7 | 0 | 2.961015  | 5.174685  | 0.628376  |
| 31 | 7 | 0 | 1.962441  | 4.842404  | 3.364029  |
| 32 | 8 | 0 | 6.669383  | 8.845667  | 2.581990  |
| 33 | 1 | 0 | 5.891525  | 9.303564  | 2.228496  |
| 34 | 1 | 0 | 6.400966  | 8.442894  | 3.415594  |
| 35 | 8 | 0 | 1.932876  | 9.632432  | 2.241854  |
| 36 | 1 | 0 | 1.151449  | 9.727900  | 1.654875  |
| 37 | 1 | 0 | 1.653901  | 9.931813  | 3.124780  |
| 38 | 8 | 0 | 3.610404  | 8.443839  | 4.331435  |
| 39 | 1 | 0 | 4.453154  | 8.242618  | 4.778552  |
| 40 | 1 | 0 | 3.064142  | 9.020980  | 4.878524  |
| 41 | 8 | 0 | 6.060501  | 7.621961  | 5.183256  |
| 42 | 8 | 0 | 4.589304  | 10.206379 | 1.173676  |
| 43 | 8 | 0 | 1.278983  | 9.747868  | 4.914229  |
| 44 | 8 | 0 | -0.274615 | 9.395922  | 0.725645  |
| 45 | 1 | 0 | 0.670543  | 10.237116 | 5.465898  |
| 46 | 1 | 0 | 0.898930  | 8.857647  | 4.751495  |
| 47 | 1 | 0 | 5.909017  | 6.655656  | 5.206790  |
| 48 | 1 | 0 | 6.474087  | 7.860906  | 6.012506  |
| 49 | 1 | 0 | 3.780790  | 10.367139 | 1.673873  |
| 50 | 1 | 0 | 4.327784  | 9.456821  | 0.612256  |
| 51 | 1 | 0 | -0.264424 | 9.659038  | -0.194929 |
| 52 | 1 | 0 | -0.068762 | 8.438233  | 0.725030  |
| 53 | 6 | 0 | 2.404505  | 2.354730  | 3.184352  |
| 54 | 1 | 0 | 1.624666  | 2.200002  | 3.931775  |
| 55 | 1 | 0 | 3.356868  | 2.405711  | 3.717402  |
| 56 | 6 | 0 | 3.336261  | 2.691778  | 0.441839  |
| 57 | 1 | 0 | 2.423407  | 2.580318  | -0.148037 |
| 58 | 1 | 0 | 4.148390  | 2.862147  | -0.264882 |
| 59 | 6 | 0 | 3.574434  | 1.395812  | 1.205448  |
| 60 | 6 | 0 | 2.468852  | 1.173028  | 2.226485  |
| 61 | 1 | 0 | 2.641854  | 0.255408  | 2.789603  |
| 62 | 1 | 0 | 1.510298  | 1.057098  | 1.712099  |
| 63 | 1 | 0 | 4.538727  | 1.441648  | 1.720170  |
| 64 | 1 | 0 | 3.628199  | 0.562687  | 0.503871  |

-----  
E(RwB97XD) = -1827.4561477 Hartree; Zero-point correction = 0.514078; Thermal correction to Energy = 0.554910; Thermal correction to Enthalpy = 0.555854; Thermal correction to Gibbs Free Energy = 0.442243; Sum of electronic and zero-point Energies = -1826.942070; Sum of electronic and thermal Energies = -1826.901238; Sum of electronic and thermal Enthalpies = -1826.900294; Sum of electronic and thermal Free Energies = -1827.013905.

**Sample Gaussian input file:**

```
%mem=8gb
%chk=freq_Gd_27H2O_wB97XD_2.chk
# rwB97XD/gen pseudo=cards freq=nraman scf=tight opt Integral=superfinegrid
scrf=(read,pcm,solvent=water,iterative) nosymmetry
```

freq\_Gd\_27H2O\_wB97XD\_2

```
3 1
Gd      0.17947300  0.11840600  0.08737000
O       2.16714000 -0.12931300  1.53860100
H       2.02075500 -0.15467400  2.49917400
H       2.82084800 -0.83007800  1.33507400
O       0.16094200  1.88963700  1.82562600
H       0.86621400  2.25349700  2.38497400
H      -0.68162100  2.27008700  2.11892800
```

|   |             |             |             |
|---|-------------|-------------|-------------|
| O | 1.76801100  | -1.31815500 | -1.08985700 |
| H | 1.61380100  | -2.20856600 | -1.44556100 |
| H | 2.53413400  | -0.92504300 | -1.55818200 |
| O | 0.05692700  | -2.15643800 | 1.11302300  |
| H | 0.72977200  | -2.85701200 | 1.07902100  |
| H | -0.80529500 | -2.56846800 | 1.27507300  |
| O | 1.89895000  | 1.72276200  | -0.61085200 |
| H | 1.74127900  | 2.42892300  | -1.26084700 |
| H | 2.53770700  | 2.06285600  | 0.05069600  |
| O | 0.06342100  | 0.70453700  | -2.46021100 |
| H | 0.82077000  | 0.75827100  | -3.06176000 |
| H | -0.69078500 | 0.38369500  | -2.97460400 |
| O | -1.75003600 | -0.03975800 | 1.66492000  |
| H | -1.60052300 | -0.19444000 | 2.61065500  |
| H | -2.57927400 | -0.47224300 | 1.40415000  |
| O | -1.56843000 | -1.20681600 | -1.01949800 |
| H | -1.56714400 | -2.12254500 | -1.33731300 |
| H | -2.39316900 | -0.78380500 | -1.31093400 |
| O | -1.57595300 | 1.71718800  | -0.53884100 |
| H | -1.53539500 | 2.32714700  | -1.29133600 |
| H | -2.42891300 | 1.82683700  | -0.07972300 |
| O | 3.97256700  | -2.12370900 | 1.10116400  |
| O | 2.01614700  | -4.06673200 | 0.74918800  |
| O | 1.62070100  | 0.02267700  | 4.25083500  |
| O | -1.12526000 | -0.41663500 | 4.36501800  |
| O | -3.99301500 | 1.88853800  | 0.77019200  |
| O | -3.95339700 | -0.05439600 | -1.86008200 |
| O | 3.87462200  | -0.08911300 | -2.26937000 |
| O | 2.29375100  | 1.40124000  | -3.98254200 |
| O | 1.25390600  | -3.92228900 | -1.85078700 |
| O | -1.49087600 | -3.79088100 | -2.08636300 |
| O | -4.18369300 | -1.13993100 | 0.83980700  |
| O | 1.40530400  | 3.57605600  | -2.59994300 |
| O | -1.36980500 | 3.57556800  | -2.63404400 |
| O | 3.73115700  | 2.65906800  | 1.17480700  |
| O | 2.22557900  | 2.57048300  | 3.51287700  |
| H | -4.23956500 | -1.08439700 | -0.12111900 |
| H | -4.02540500 | 0.85204900  | -1.55260900 |
| H | -4.21076300 | 0.99320500  | 1.04953200  |
| H | -3.80496100 | -2.01028200 | 1.03634900  |
| H | -3.55162900 | -0.00099000 | -2.74295500 |
| H | -3.54770500 | 2.29076400  | 1.53326900  |
| H | 3.29173200  | 2.62843600  | 2.04125100  |
| H | 4.40104600  | 1.97527800  | 1.21477800  |
| H | 3.41716800  | 0.45094700  | -2.93760600 |
| H | 4.08793100  | 0.53370000  | -1.57192900 |
| H | 3.36987100  | -2.87088400 | 0.94357900  |
| H | 4.42558500  | -1.98572700 | 0.26856200  |
| H | 2.10089200  | 2.30858800  | -3.68652600 |
| H | 1.80899600  | -4.24248700 | -0.18687600 |
| H | 2.11486100  | 1.73295100  | 3.99749200  |
| H | 2.17866400  | 3.28205800  | 4.15137200  |
| H | 2.33833400  | 1.41467800  | -4.93852700 |
| H | 2.03019700  | -4.90941700 | 1.20333700  |
| H | 0.43481300  | 3.64642900  | -2.65251500 |
| H | 0.29393000  | -3.98930700 | -2.00022000 |
| H | 0.66699900  | -0.14044700 | 4.36241400  |
| H | 1.74933200  | 4.46838600  | -2.55170700 |
| H | 2.07507000  | -0.53976200 | 4.87869200  |
| H | 1.68647700  | -4.32004500 | -2.60684400 |

|   |             |             |             |
|---|-------------|-------------|-------------|
| H | -1.71237300 | 3.25233100  | -3.46956100 |
| H | -1.58881200 | 0.19178700  | 4.94436400  |
| H | -1.99120700 | -4.47565200 | -1.63819400 |
| H | -1.81714500 | 4.40868100  | -2.47244300 |
| H | -1.34741900 | -1.29466200 | 4.68247100  |
| H | -1.82037100 | -3.77625200 | -2.98758400 |
| H | -2.58188600 | -3.33267300 | 2.63842300  |
| H | -2.62543700 | -4.16783200 | 1.36397800  |
| H | -2.44877200 | 2.88678400  | 3.60771000  |
| H | -2.24304100 | 4.02537500  | 2.61108900  |
| H | -2.32445700 | 0.48062700  | -4.79611700 |
| H | -2.10836800 | -0.97798900 | -4.39547900 |
| O | -2.27231300 | 3.06913300  | 2.68273300  |
| O | -2.20781800 | -0.09379000 | -4.03677700 |
| O | -2.50343900 | -3.27186100 | 1.68396000  |

Gd 0

S 3 1.0

7.9250430 -0.1522640

6.2717590 0.4939230

2.5909130 -1.2945530

S 1 1.0

0.6425090 1.0000000

S 1 1.0

0.3128260 1.0000000

S 1 1.0

0.0584800 1.0000000

S 1 1.0

0.0269240 1.0000000

P 3 1.0

5.2050550 0.1141430

3.1110210 -0.4426100

0.7437650 1.1665320

P 1 1.0

0.3127020 1.0000000

P 1 1.0

0.0943750 1.0000000

P 1 1.0

0.0336140 1.0000000

D 3 1.0

2.5342090 -0.0394870

0.8067320 0.3908310

0.3203550 0.7016280

D 1 1.0

0.1242070 1.0000000

D 1 1.0

0.0480910 1.0000000

\*\*\*\*

H O 0

Def2tzvpp

\*\*\*\*

Gd 0

ECP53MWB 4 53

G-Komponente

1

2 1.000000 0.000000

S-G

2

2 5.026000 139.601619

```
2 2.513000 -6.879694
P-G
2
2 4.302200 79.873824
2 2.151100 0.938419
D-G
2
2 3.001100 32.709729
2 1.505500 1.241952
F-G
1
2 6.204900 -74.248790
```

modifysph

```
O 1.9250 1.0
H 1.5873 1.0
```

**Sample ORCA input file (DFT):**

```
#
# DKH2_Gd27H2O_2_TPSSh
#
! uks tpssh tightscf dkh2 RIJCOSX UNO autoaux DKH-def2-TZVPP
%basis
newgto Gd "SARC2-DKH-QZVP" end
newauxcgto Gd "SARC2-DKH-QZVP/JK" end
newauxjkgto Gd "SARC2-DKH-QZVP/JK" end
end
%pal
nprocs 24
end
% maxcore 25000
* xyz 3 8
Gd      0.17945000  0.12079200  0.06310700
O       2.16486100 -0.12002800  1.53094400
H       2.01384200 -0.14093000  2.49073900
H       2.81408800 -0.82658400  1.33442200
O       0.15633600  1.91014800  1.78546500
H       0.85887600  2.26938500  2.35125800
H      -0.68876100  2.27704900  2.08830000
O       1.78421300 -1.33013400 -1.08471200
H       1.62488000 -2.21817200 -1.44398000
```

|   |             |             |             |
|---|-------------|-------------|-------------|
| H | 2.54946100  | -0.93873300 | -1.55541800 |
| O | 0.05890300  | -2.14921300 | 1.10543100  |
| H | 0.73037400  | -2.85102400 | 1.07379400  |
| H | -0.80376800 | -2.55988400 | 1.26791300  |
| O | 1.91830200  | 1.71727600  | -0.62179100 |
| H | 1.76105100  | 2.42973000  | -1.26470800 |
| H | 2.55475300  | 2.05243500  | 0.04434500  |
| O | 0.07410700  | 0.67466300  | -2.41694000 |
| H | 0.82813100  | 0.74671300  | -3.02240300 |
| H | -0.68933800 | 0.38867000  | -2.93958500 |
| O | -1.74417100 | -0.03444700 | 1.65774900  |
| H | -1.59088600 | -0.19229400 | 2.60226900  |
| H | -2.57220600 | -0.47058600 | 1.40025700  |
| O | -1.58100700 | -1.22015600 | -1.01517100 |
| H | -1.57131100 | -2.13287800 | -1.34142500 |
| H | -2.40621000 | -0.80031100 | -1.30880100 |
| O | -1.60294000 | 1.70191600  | -0.55442800 |
| H | -1.55738100 | 2.33482400  | -1.28731700 |
| H | -2.44691500 | 1.81671700  | -0.08066800 |
| O | 3.96728600  | -2.12742500 | 1.11709900  |
| O | 2.01156300  | -4.07029600 | 0.75209100  |
| O | 1.61587000  | 0.04353600  | 4.24430200  |
| O | -1.12353700 | -0.41914300 | 4.35856000  |
| O | -4.00899900 | 1.87751100  | 0.77843900  |
| O | -3.97089900 | -0.06494800 | -1.85624700 |
| O | 3.88661100  | -0.09875500 | -2.27397900 |
| O | 2.26958800  | 1.37976700  | -3.96890300 |
| O | 1.25948800  | -3.93074400 | -1.85220200 |
| O | -1.48335500 | -3.79311400 | -2.10336300 |
| O | -4.18616400 | -1.14404700 | 0.85053000  |
| O | 1.41436700  | 3.57621400  | -2.60413600 |
| O | -1.36135500 | 3.60009400  | -2.60920900 |
| O | 3.74718600  | 2.64911100  | 1.17114000  |
| O | 2.21048700  | 2.58722000  | 3.48867700  |
| H | -4.24598600 | -1.09422300 | -0.11039200 |
| H | -4.03389800 | 0.83723300  | -1.53409000 |

|   |             |             |             |
|---|-------------|-------------|-------------|
| H | -4.22094200 | 0.98171600  | 1.06110800  |
| H | -3.80185000 | -2.01143500 | 1.04973100  |
| H | -3.55861400 | 0.00062300  | -2.73318500 |
| H | -3.55929300 | 2.28315800  | 1.53710400  |
| H | 3.29686200  | 2.62747400  | 2.03232500  |
| H | 4.40704600  | 1.95629600  | 1.22153500  |
| H | 3.42007100  | 0.43848800  | -2.93782500 |
| H | 4.09846800  | 0.52486400  | -1.57675800 |
| H | 3.36390600  | -2.87342400 | 0.95689600  |
| H | 4.42293400  | -1.99014200 | 0.28579400  |
| H | 2.08790700  | 2.29321600  | -3.68452700 |
| H | 1.80764700  | -4.24750000 | -0.18434100 |
| H | 2.09894600  | 1.75274700  | 3.97855900  |
| H | 2.16334800  | 3.30291400  | 4.12254300  |
| H | 2.28924300  | 1.37559700  | -4.92587100 |
| H | 2.01917600  | -4.91181800 | 1.20851000  |
| H | 0.44425600  | 3.65722200  | -2.64597100 |
| H | 0.30008000  | -3.99450000 | -2.00656200 |
| H | 0.66404800  | -0.12781700 | 4.35952800  |
| H | 1.76887200  | 4.46490300  | -2.56527800 |
| H | 2.07736100  | -0.51162300 | 4.87343600  |
| H | 1.69442800  | -4.33084100 | -2.60564800 |
| H | -1.71854300 | 3.30262800  | -3.44823300 |
| H | -1.59616700 | 0.18010200  | 4.94012000  |
| H | -1.98761600 | -4.48217900 | -1.66626500 |
| H | -1.79211100 | 4.43729900  | -2.42445800 |
| H | -1.33858800 | -1.30183700 | 4.66782300  |
| H | -1.80686300 | -3.76725900 | -3.00648200 |
| H | -2.57159200 | -3.35211600 | 2.63433400  |
| H | -2.61872200 | -4.16367000 | 1.34447700  |
| H | -2.44229300 | 2.87625500  | 3.60049200  |
| H | -2.25572600 | 4.02349300  | 2.61004100  |
| H | -2.30546400 | 0.52610100  | -4.76048100 |
| H | -2.08776600 | -0.93910600 | -4.38564200 |
| O | -2.27839200 | 3.06660800  | 2.67484600  |
| O | -2.19062700 | -0.06173300 | -4.01114500 |

```

O          -2.49810900 -3.27347800  1.68079700
*
%cpcm smd true # turn on SMD
SMDsolvent "water" # specify the name of solvent from the list
end
%method
AngularGrid 7
AngularGridX 5
IntAccX 4.5
end
%epnrmr Nuclei= all O {aiso,adip,fgrad}
end
%scf
MaxIter 3000
end

```

**Sample ORCA input file (NEVPT2):**

```

#
# CASSCF_NO2PP1PA2
#
! RJCOSX tightscf Normalprint dkh2 autoaux moread DKH-def2-TZVPP
%moinp "DKH2_Gd27H2O_2_TPSSh.gro"
%basis basis "DKH-def2-TZVP"
newgto Gd "SARC2-DKH-QZVP" end
newauxcgto Gd "SARC2-DKH-QZVP/JK" end
newauxjkgto Gd "SARC2-DKH-QZVP/JK" end
end
%pal
  nprocs 30
end
% maxcore 70000
* xyz 3 8
Gd          0.17945000  0.12079200  0.06310700
O           2.16486100 -0.12002800  1.53094400
H           2.01384200 -0.14093000  2.49073900
H           2.81408800 -0.82658400  1.33442200

```



|   |             |             |             |
|---|-------------|-------------|-------------|
| O | 0.15633600  | 1.91014800  | 1.78546500  |
| H | 0.85887600  | 2.26938500  | 2.35125800  |
| H | -0.68876100 | 2.27704900  | 2.08830000  |
| O | 1.78421300  | -1.33013400 | -1.08471200 |
| H | 1.62488000  | -2.21817200 | -1.44398000 |
| H | 2.54946100  | -0.93873300 | -1.55541800 |
| O | 0.05890300  | -2.14921300 | 1.10543100  |
| H | 0.73037400  | -2.85102400 | 1.07379400  |
| H | -0.80376800 | -2.55988400 | 1.26791300  |
| O | 1.91830200  | 1.71727600  | -0.62179100 |
| H | 1.76105100  | 2.42973000  | -1.26470800 |
| H | 2.55475300  | 2.05243500  | 0.04434500  |
| O | 0.07410700  | 0.67466300  | -2.41694000 |
| H | 0.82813100  | 0.74671300  | -3.02240300 |
| H | -0.68933800 | 0.38867000  | -2.93958500 |
| O | -1.74417100 | -0.03444700 | 1.65774900  |
| H | -1.59088600 | -0.19229400 | 2.60226900  |
| H | -2.57220600 | -0.47058600 | 1.40025700  |
| O | -1.58100700 | -1.22015600 | -1.01517100 |
| H | -1.57131100 | -2.13287800 | -1.34142500 |
| H | -2.40621000 | -0.80031100 | -1.30880100 |
| O | -1.60294000 | 1.70191600  | -0.55442800 |
| H | -1.55738100 | 2.33482400  | -1.28731700 |
| H | -2.44691500 | 1.81671700  | -0.08066800 |
| O | 3.96728600  | -2.12742500 | 1.11709900  |
| O | 2.01156300  | -4.07029600 | 0.75209100  |
| O | 1.61587000  | 0.04353600  | 4.24430200  |
| O | -1.12353700 | -0.41914300 | 4.35856000  |
| O | -4.00899900 | 1.87751100  | 0.77843900  |
| O | -3.97089900 | -0.06494800 | -1.85624700 |
| O | 3.88661100  | -0.09875500 | -2.27397900 |
| O | 2.26958800  | 1.37976700  | -3.96890300 |
| O | 1.25948800  | -3.93074400 | -1.85220200 |
| O | -1.48335500 | -3.79311400 | -2.10336300 |
| O | -4.18616400 | -1.14404700 | 0.85053000  |
| O | 1.41436700  | 3.57621400  | -2.60413600 |

|   |             |             |             |
|---|-------------|-------------|-------------|
| O | -1.36135500 | 3.60009400  | -2.60920900 |
| O | 3.74718600  | 2.64911100  | 1.17114000  |
| O | 2.21048700  | 2.58722000  | 3.48867700  |
| H | -4.24598600 | -1.09422300 | -0.11039200 |
| H | -4.03389800 | 0.83723300  | -1.53409000 |
| H | -4.22094200 | 0.98171600  | 1.06110800  |
| H | -3.80185000 | -2.01143500 | 1.04973100  |
| H | -3.55861400 | 0.00062300  | -2.73318500 |
| H | -3.55929300 | 2.28315800  | 1.53710400  |
| H | 3.29686200  | 2.62747400  | 2.03232500  |
| H | 4.40704600  | 1.95629600  | 1.22153500  |
| H | 3.42007100  | 0.43848800  | -2.93782500 |
| H | 4.09846800  | 0.52486400  | -1.57675800 |
| H | 3.36390600  | -2.87342400 | 0.95689600  |
| H | 4.42293400  | -1.99014200 | 0.28579400  |
| H | 2.08790700  | 2.29321600  | -3.68452700 |
| H | 1.80764700  | -4.24750000 | -0.18434100 |
| H | 2.09894600  | 1.75274700  | 3.97855900  |
| H | 2.16334800  | 3.30291400  | 4.12254300  |
| H | 2.28924300  | 1.37559700  | -4.92587100 |
| H | 2.01917600  | -4.91181800 | 1.20851000  |
| H | 0.44425600  | 3.65722200  | -2.64597100 |
| H | 0.30008000  | -3.99450000 | -2.00656200 |
| H | 0.66404800  | -0.12781700 | 4.35952800  |
| H | 1.76887200  | 4.46490300  | -2.56527800 |
| H | 2.07736100  | -0.51162300 | 4.87343600  |
| H | 1.69442800  | -4.33084100 | -2.60564800 |
| H | -1.71854300 | 3.30262800  | -3.44823300 |
| H | -1.59616700 | 0.18010200  | 4.94012000  |
| H | -1.98761600 | -4.48217900 | -1.66626500 |
| H | -1.79211100 | 4.43729900  | -2.42445800 |
| H | -1.33858800 | -1.30183700 | 4.66782300  |
| H | -1.80686300 | -3.76725900 | -3.00648200 |
| H | -2.57159200 | -3.35211600 | 2.63433400  |
| H | -2.61872200 | -4.16367000 | 1.34447700  |
| H | -2.44229300 | 2.87625500  | 3.60049200  |

```
H      -2.25572600  4.02349300  2.61004100
H      -2.30546400  0.52610100 -4.76048100
H      -2.08776600 -0.93910600 -4.38564200
O      -2.27839200  3.06660800  2.67484600
O      -2.19062700 -0.06173300 -4.01114500
O      -2.49810900 -3.27347800  1.68079700
```

```
*
```

```
%cpcm smd true # turn on SMD
```

```
SMDsolvent "water" # specify the name of solvent from the list
```

```
end
```

```
%method
```

```
AngularGrid 7
```

```
AngularGridX 5
```

```
IntAccX 4.5
```

```
end
```

```
%rel
```

```
picturechange true
```

```
FiniteNuc true
```

```
end
```

```
%casscf
```

```
nel 7
```

```
norb 7
```

```
mult 8,6
```

```
nroots 1,48
```

```
trafostep ri
```

```
PTMethod sc_nevpt2
```

```
PTSettings
```

```
QDType QD_VanVleck
```

```
end
```

```
rel
```

```
DoSOC true
```

```
NInitStates 8
```

```
end
```

```
end
```
